# Supplementary material for: Designing Asynchronous Remote Support for Behavioral Activation in Teenagers With Depression: Formative Study
Source: PubMed Central journal article supplement (PMC8317030; doi:10.2196/20969), 2021-07-13
Supplement: formative_v5i7e20969_app4.pdf [file formative_v5i7e20969_app4.pdf]

## APPENDIX : Summary of BA sessions - short (4-6 weeks)

| Session                                                                       | Description                                                                                                                                                                                                                                                                                                                                  | Example                                                                                                                                                                                                                                                                                                                                                                                                                                                                                                     |
|-------------------------------------------------------------------------------|----------------------------------------------------------------------------------------------------------------------------------------------------------------------------------------------------------------------------------------------------------------------------------------------------------------------------------------------|-------------------------------------------------------------------------------------------------------------------------------------------------------------------------------------------------------------------------------------------------------------------------------------------------------------------------------------------------------------------------------------------------------------------------------------------------------------------------------------------------------------|
| <b>Week 1:<br/>Introduction<br/>to<br/>Behavioral<br/>Activation<br/>(BA)</b> | <ul style="list-style-type: none"> <li>● Introduce the BA model of depression and treatment.</li> <br/> <li>● Review how situations, feelings, and actions lead to downward or upward spiraling of mood.</li> <br/> <li>● Introduce tracking activities and how you feel (mood) during or after each activity throughout the day.</li> </ul> | <ol style="list-style-type: none"> <li>1. BA Model example: Stressful situations can lead to negative mood and behaviors that make things harder to feel better (e.g., staying in your room more, not doing homework).</li> <br/> <li>2. Those negative behaviors may lead to more problems/stress which results in <i>a downward spiral</i> towards low mood/depression.</li> </ol> <p>Upward spirals: When your actions follow a <i>goal</i> instead of your <i>mood</i> to help improve how you feel</p> |

|                                 |                                                                                                                                                                                                                                                                                                                                                                                  |                                                                                                                                                                                                                                                                                                                                          |
|---------------------------------|----------------------------------------------------------------------------------------------------------------------------------------------------------------------------------------------------------------------------------------------------------------------------------------------------------------------------------------------------------------------------------|------------------------------------------------------------------------------------------------------------------------------------------------------------------------------------------------------------------------------------------------------------------------------------------------------------------------------------------|
| <b>Week 2:<br/>Goal Setting</b> | <ul style="list-style-type: none"><li>● Talk through how to set SMART goals (Specific, Measurable, Appealing, Realistic, and Time-Bound) related to improving mood</li><li>● Introduce importance of breaking down the goals into smaller steps, i.e., mini-steps to reach a goal.</li><li>● Practice setting up SMART goals and mini-steps for the week for yourself.</li></ul> | <ol style="list-style-type: none"><li>1. SMART Goal Example: I plan to go on a 30-min walk with my dog and friend 3x this week</li><li>2. Mini-steps: 1) Check the weather to find the best days; 2) text my friend to see which days work; 3) pick a park or walking route; 4) send myself/my friend a google calendar invite</li></ol> |
|---------------------------------|----------------------------------------------------------------------------------------------------------------------------------------------------------------------------------------------------------------------------------------------------------------------------------------------------------------------------------------------------------------------------------|------------------------------------------------------------------------------------------------------------------------------------------------------------------------------------------------------------------------------------------------------------------------------------------------------------------------------------------|

|                                                                                  |                                                                                                                                                                                                                                                                       |                                                                                                                                                                                                                                                                                                                                                                                                                                                                                                                                                                                               |
|----------------------------------------------------------------------------------|-----------------------------------------------------------------------------------------------------------------------------------------------------------------------------------------------------------------------------------------------------------------------|-----------------------------------------------------------------------------------------------------------------------------------------------------------------------------------------------------------------------------------------------------------------------------------------------------------------------------------------------------------------------------------------------------------------------------------------------------------------------------------------------------------------------------------------------------------------------------------------------|
| <p><b>Week 3:<br/>Identifying<br/>Barriers &amp;<br/>Problem<br/>Solving</b></p> | <ul style="list-style-type: none"> <li>● Importance of identifying internal and external barriers that get in the way of accomplishing goals.</li> <br/> <li>● Introduce problem-solving to help overcome barriers</li> <br/> <li>● Practice goal-setting.</li> </ul> | <p>1. Examples of Barriers:</p> <p><i>Internal barriers</i> include not feeling motivated, getting distracted, difficulty communicating your needs, feeling overwhelmed.</p> <p><i>External barriers</i> include not having the right “tools” (e.g., need exercise equipment from a gym), need help from others (e.g., need a ride), other people not following through, or cost.</p><br><p>2. Problem-solving example: When encountering a barrier, you can use <i>COPE</i>: Calm yourself then Clarify the issue, brainstorm Options, Pick and Perform an option, Evaluate how it went.</p> |
|----------------------------------------------------------------------------------|-----------------------------------------------------------------------------------------------------------------------------------------------------------------------------------------------------------------------------------------------------------------------|-----------------------------------------------------------------------------------------------------------------------------------------------------------------------------------------------------------------------------------------------------------------------------------------------------------------------------------------------------------------------------------------------------------------------------------------------------------------------------------------------------------------------------------------------------------------------------------------------|

|                                                    |                                                                                                                                                                                                                                                                                                               |                                                                                                                                                                                                                                                                                                                                                                                                                                                                                                                                                                                                                                                                                                                                                                                     |
|----------------------------------------------------|---------------------------------------------------------------------------------------------------------------------------------------------------------------------------------------------------------------------------------------------------------------------------------------------------------------|-------------------------------------------------------------------------------------------------------------------------------------------------------------------------------------------------------------------------------------------------------------------------------------------------------------------------------------------------------------------------------------------------------------------------------------------------------------------------------------------------------------------------------------------------------------------------------------------------------------------------------------------------------------------------------------------------------------------------------------------------------------------------------------|
| <p><b>Week 4.<br/>Overcoming<br/>Avoidance</b></p> | <ul style="list-style-type: none"> <li>● Explaining that wanting to avoid something (avoidance) is a common internal barrier.</li> <br/> <li>● Understanding your Trigger, Response, and <i>Avoidance Pattern</i> (TRAP).</li> <br/> <li>● Using <i>Alternative Coping</i> to get back on TRAC(k).</li> </ul> | <ol style="list-style-type: none"> <li>1. Examples of Avoidance: <ul style="list-style-type: none"> <li><i>Brooding</i> over a problem instead of solving it,</li> <li><i>Procrastinating</i> taking action,</li> <li><i>Hibernating</i> in your room or withdrawing socially,</li> <li><i>Bursting</i> at people out of anger.</li> </ul> </li> <br/> <li>2. Example of TRAP/TRAC(k): <ul style="list-style-type: none"> <li>I feel triggered when my mom yells at me to clean my room, I respond by feeling angry and worthless, and I have an <i>Avoidance Pattern</i> of yelling back and starting a fight. I will try</li> <br/> <li><i>Alternative Coping</i> of putting on my favorite dance song and listening to a podcast while I pick up my room.</li> </ul> </li> </ol> |
| <p><b>Week 5 &amp; 6:<br/>Practice</b></p>         | <p>Practice setting SMART Goals and Overcoming Barriers to goals.</p>                                                                                                                                                                                                                                         |                                                                                                                                                                                                                                                                                                                                                                                                                                                                                                                                                                                                                                                                                                                                                                                     |
